# Supplementary material for: On soil bulk density and its influence to soil moisture estimation with cosmic-ray neutrons
Source: Copernicus journal article supplement (doi:10.5194/hess-2022-123), 2022-04-11
Supplement: Supplementary file 1 [file Cbd_parameters.xlsx]

## Sheet: Koe function
Approach for Cbd	valid range (m³/m³)	a	Stdevs da	b	Stdevs db	c	Stdevs dc	d	Stdevs dd	R²
a + b(1/ϱbd) + c(1/ϱbd)² + d(1/ϱbd)³	0.35 ≤ θ ≤ 0.50	1.15943	±0.01468	-0.25085	±0.05656	0.08571	±0.06399	0.00465	±0.02195	0.943
(a + bexp(cϱbd))-1	0.35 ≤ θ ≤ 0.50	1.02038	±0.00611	-0.19976	±0.01553	-2.12401	±0.32451			0.918
a + b(θ/ϱbd) + c(θ/ϱbd)² + d(θ/ϱbd)³	0.20 ≤ θ ≤ 0.50	1.01776	±0.00323	-0.16509	±0.01764	0.35565	±0.02482	-0.13413	±0.00937	0.944
(a + bexp(cϱbd/θ))-1	0.20 ≤ θ ≤ 0.50	1.00451	±0.00163	-0.23026	±0.01942	-1.28373	±0.10075			0.896

## Sheet: Des function
Approach for Cbd and N0(0.05)	valid range (m³/m³)	a	Stdevs da	b	Stdevs db	c	Stdevs dc	d	Stdevs dd	R²
a + b(1/ϱbd) + c(1/ϱbd)² + d(1/ϱbd)³	0.05 ≤ θ ≤ 0.50	1	±0.03098	-0.48605	±0.09538	0.43524	±0.08443	-0.09921	±0.02208	0.276
(a + bexp(cϱbd))-1	0.05 ≤ θ ≤ 0.50	1	±0.0584	0.27605	±0.043	-0.70737	±0.32315			0.532
a + b(θ/ϱbd) + c(θ/ϱbd)² + d(θ/ϱbd)³	0.05 ≤ θ ≤ 0.50	1	±0.00471	-0.62937	±0.02921	-0.64079	±0.04419	-0.19816	±0.01724	0.873
(a + bexp(cϱbd/θ))-1	0.05 ≤ θ ≤ 0.50	1	±0.00631	0.24848	±0.0063	-0.11103	±0.00789			0.932
Approach for Cbd and N0(0.40)	valid range (m³/m³)	a	Stdevs da	b	Stdevs db	c	Stdevs dc	d	Stdevs dd	R²
a + b(1/ϱbd) + c(1/ϱbd)² + d(1/ϱbd)³	0.05 ≤ θ ≤ 0.50	1	±0.02705	-0.10655	±0.08582	0.12876	±0.07721	-0.02404	±0.02045	0.535
(a + bexp(cϱbd))-1	0.05 ≤ θ ≤ 0.50	1.23006	±0.19112	-0.16885	±0.18038	0.32714	±0.24269			0.575
a + b(θ/ϱbd) + c(θ/ϱbd)² + d(θ/ϱbd)³	0.05 ≤ θ ≤ 0.50	1.13432	±0.00501	-0.61614	±0.03141	0.59802	±0.04764	-0.18014	±0.01865	0.888
(a + bexp(cϱbd/θ))-1	0.05 ≤ θ ≤ 0.50	1	±0.00751	0.16715	±0.06605	-0.85209	±0.3631			0.126
